# Supplementary material
Source: PubMed Central journal article supplement (PMC3732985)
Supplement: 1216464110_pnas.201216464SI.pdf [file 1216464110_pnas.201216464SI.pdf]

# Supporting Information

Kroeker et al. 10.1073/pnas.1216464110

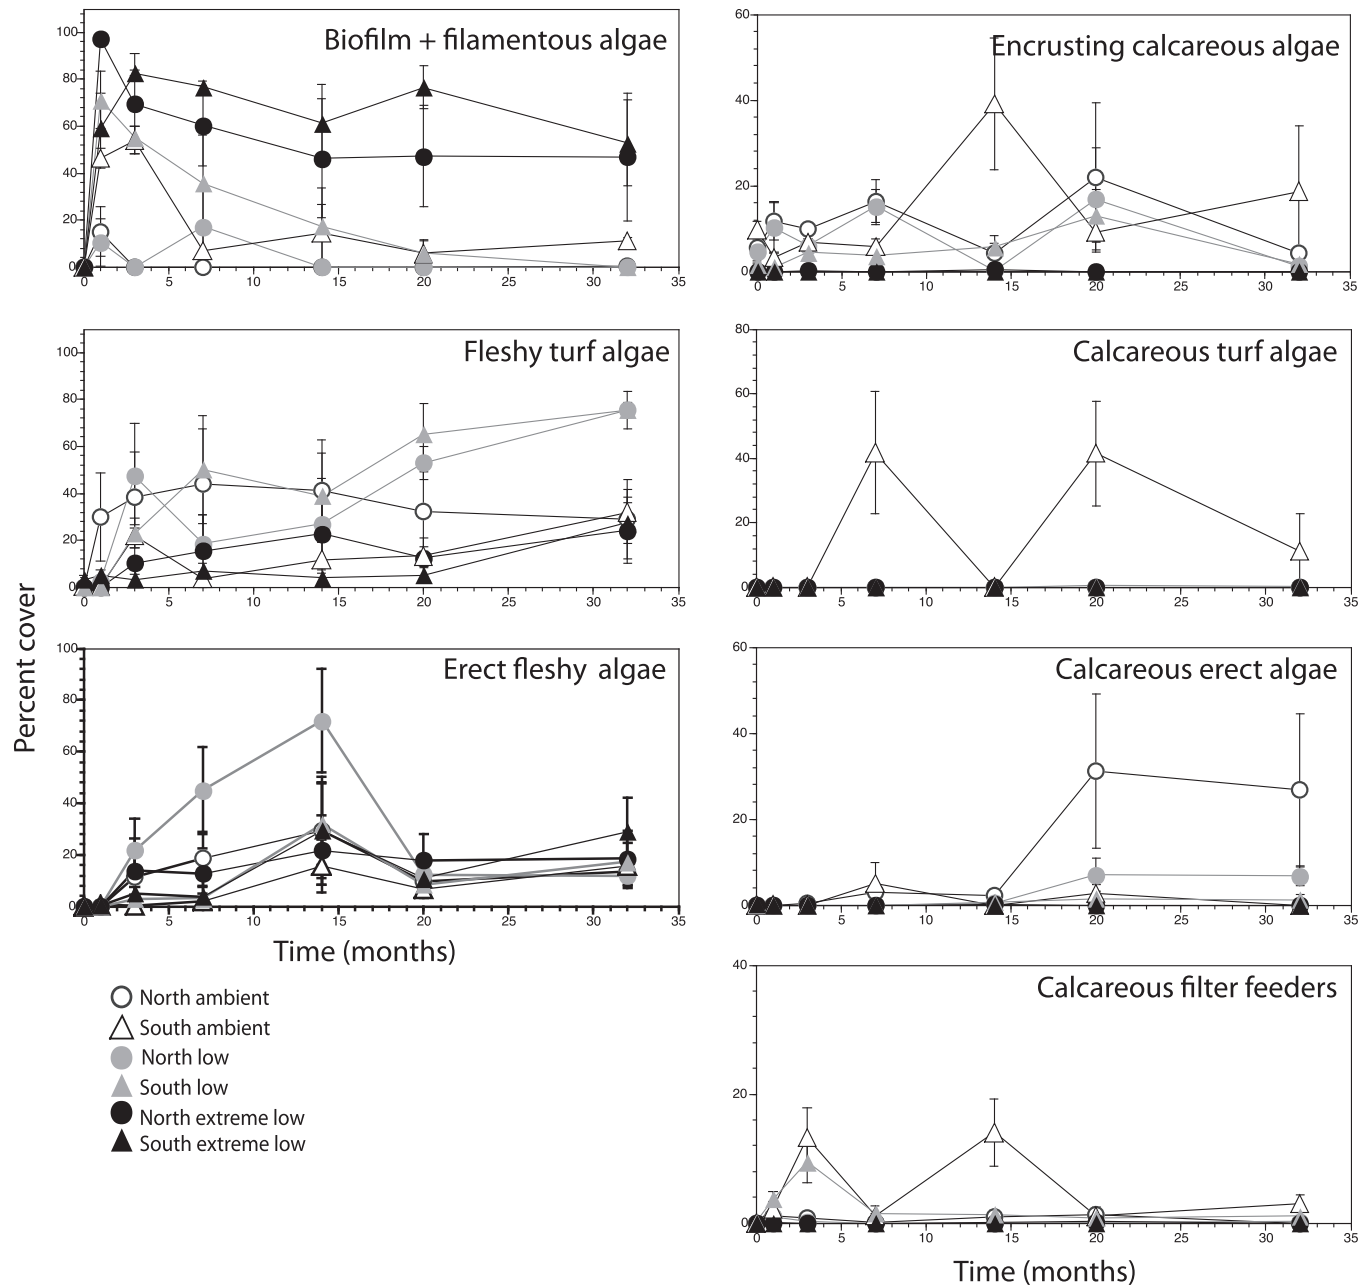

Fig. S1. Percent cover of key functional groups through time. Functional groups include those that contributed to >75% of the dissimilarity between pH zones. Noncalcareous taxa are found on the *Left*, whereas calcareous taxa are grouped together on the *Right*.

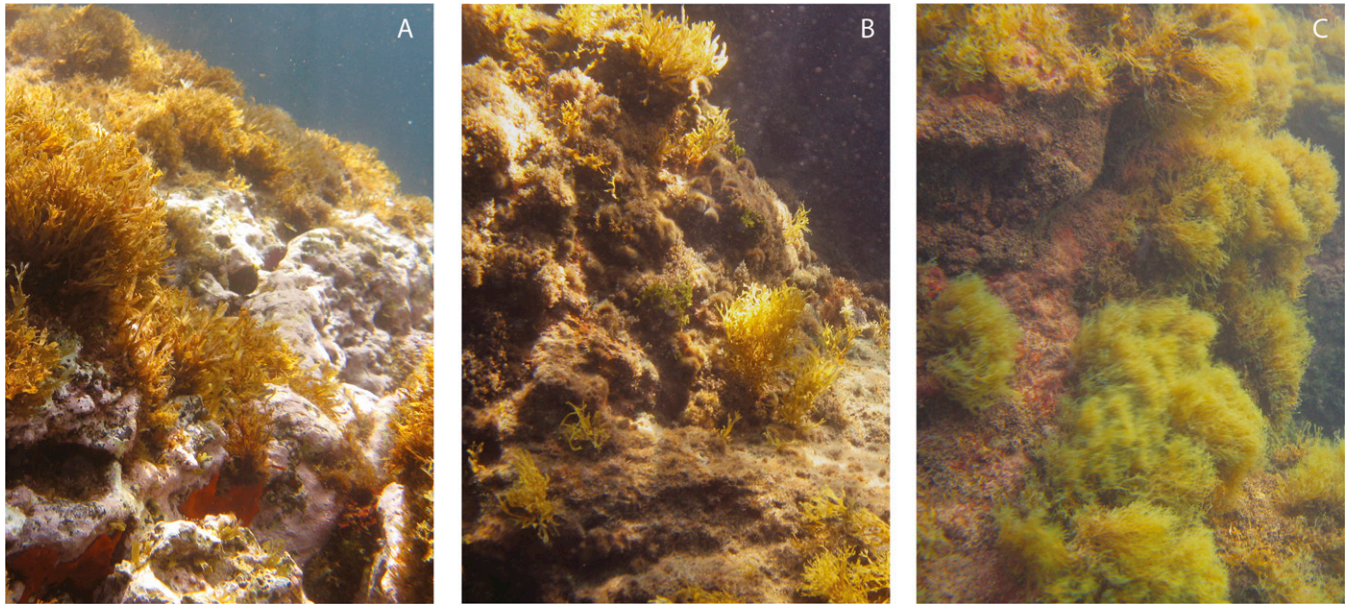

**Fig. S2.** Photographs taken of the background communities in each pH zone. (A) Ambient, (B) low, and (C) extreme low pH zones. The photos highlight (A) the presence of sea urchin halos and habitat patchiness in ambient pH, (B) low variability in community structure and high percent cover of fleshy turf algae in low pH, and (C) the depauperate communities in extreme low pH dominated by biofilm/filamentous algae and erect fleshy algae.



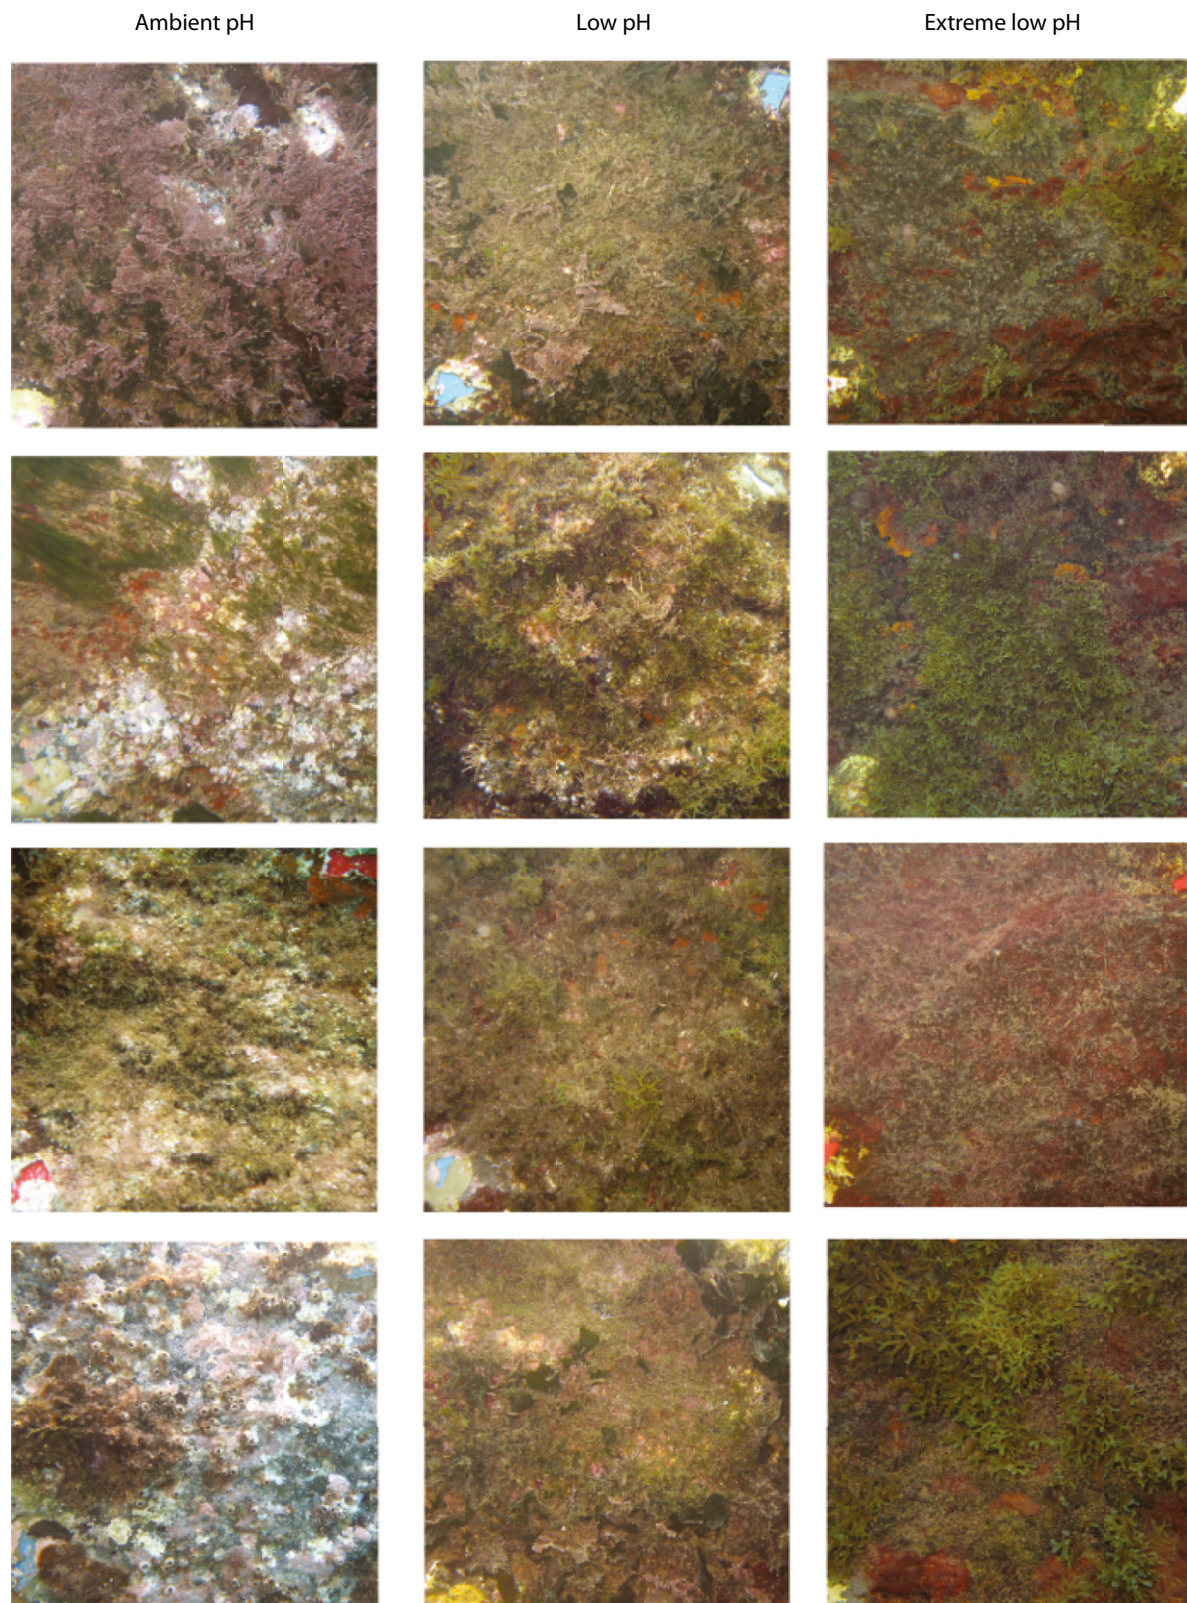

**Fig. 53.** Photos of a random subset of plots from each pH zone after 32 mo of recovery. Photos highlight the variability in assemblages in ambient pH versus the homogeneity of assemblages in low and extreme low pH.

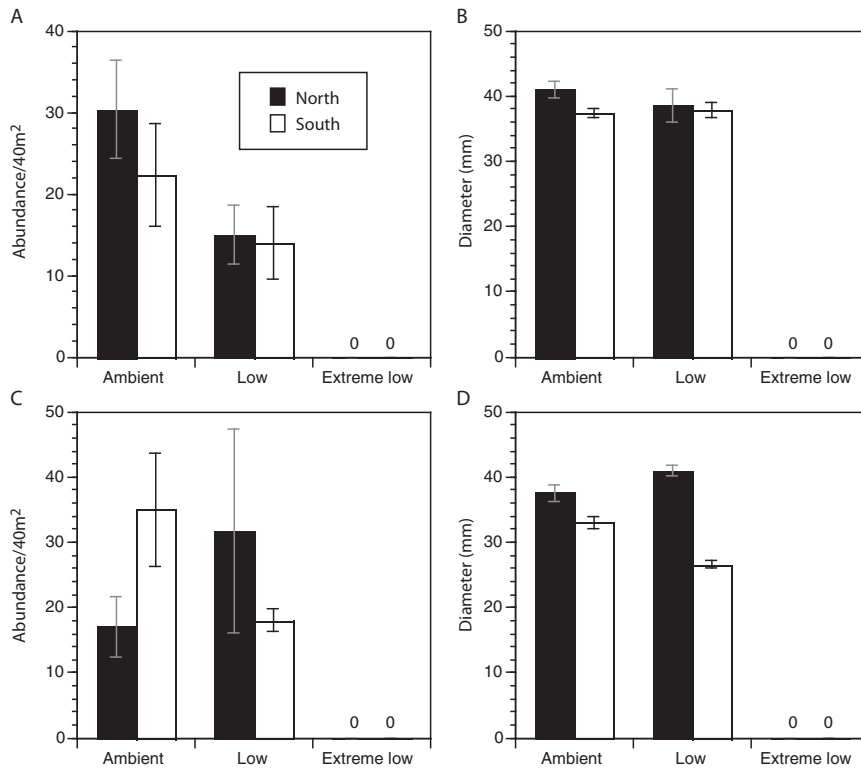

**Fig. S4.** Abundance (A and C) and size (B and D) of A and B *Arbacia lixula* and C and D *Paracentrotus lividus* urchins in each site x pH zone. Means  $\pm$  SEM,  $n = 4$ , based on repeated measurements in each site x pH zone in June 2009, October 2009, May 2010, and October 2010. We did not detect any significant differences ( $\alpha = 0.05$ ) between sites or pH zones.

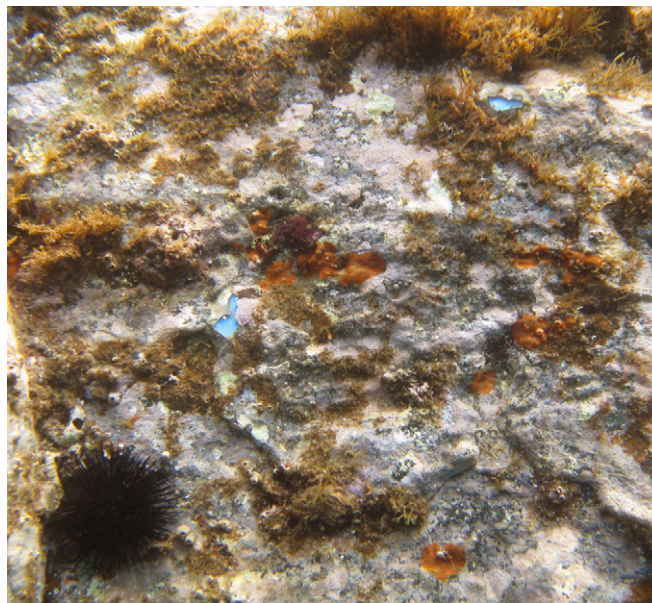

**Fig. S5.** *Arbacia lixula* near a plot in ambient pH with high percent cover of CCA. The two blue markers identify the corners of the 20 x 20 cm plot.



**Table S1. Dominant species in functional groups**

| Functional group            | Dominant taxa                                                                                                                                           |
|-----------------------------|---------------------------------------------------------------------------------------------------------------------------------------------------------|
| Biofilm/filamentous algae   | Cyanobacteria, unclassified filamentous algae                                                                                                           |
| Encrusting fleshy algae     | <i>Hildebrandia rubra</i> , <i>Ralfsia verrucosa</i>                                                                                                    |
| Encrusting calcareous algae | Unclassified crustose coralline algae                                                                                                                   |
| Fleshy turf algae           | <i>Cladophora</i> sp., <i>Bryopsis</i> sp., <i>Halopteris</i> sp., <i>Feldmannia</i> sp.                                                                |
| Calcareous turf algae       | <i>Haliptilon</i> sp.                                                                                                                                   |
| Erect fleshy algae          | <i>Dictyota dichotoma</i> , <i>Dictyota linearis</i> , <i>Flabellia petiolata</i> ,<br><i>Codium bursa</i> , <i>Bryopsis</i> sp., <i>Halopteris</i> sp. |
| Erect calcareous algae      | <i>Corallina elongata</i> , <i>Jania rubens</i> , <i>Amphiroa rigida</i> , <i>Padina pavonica</i>                                                       |
| Calcified filter feeders    | <i>Balanus perforatus</i> , <i>Spirorbis</i> sp., unclassified bryozoans                                                                                |
| Sponges                     | Unclassified                                                                                                                                            |

**Table S2. Statistical tests of differences (PERMANOVA) and variability (PERMDISP) in community structure 32 mo postclearing**

|                            | df | SS      | MS      | F    | T    | P      | No. permutations |
|----------------------------|----|---------|---------|------|------|--------|------------------|
| PERMANOVA results (source) |    |         |         |      |      |        |                  |
| Site                       | 1  | 1,225.5 | 1,225.5 | 1.26 |      | 0.3    | 9,949            |
| pH                         | 2  | 15,572  | 7,786.2 | 8.01 |      | 0.0005 | 9,946            |
| Site × pH                  | 2  | 1,930.1 | 965.03  | 0.99 |      | 0.4    | 9,937            |
| Residual                   | 18 | 17,496  | 972.02  |      |      |        |                  |
| Total                      | 23 | 36,224  |         |      |      |        |                  |
| Pairwise comparisons       |    |         |         |      |      |        |                  |
| Ambient × low              |    |         |         |      | 2.35 | 0.0001 | 9,946            |
| Low × extreme low          |    |         |         |      | 3.64 | 0.002  | 9,954            |
| Ambient × extreme low      |    |         |         |      | 2.39 | 0.005  | 9,951            |
| PERMDISP (dispersion)      |    |         |         |      |      |        |                  |
| pH                         | 2  |         |         | 8.88 |      | 0.004  |                  |
| Pairwise comparisons       |    |         |         |      |      |        |                  |
| Ambient × low              |    |         |         |      | 4.77 | 0.0004 | 9,999            |
| Low × extreme low          |    |         |         |      | 3.62 | 0.002  | 9,999            |
| Ambient × extreme low      |    |         |         |      | 0.24 | 0.8    | 9,999            |

**Table S3. Statistical tests of differences (PERMANOVA) and variability (PERMDISP) in recovery trajectories**

|                            | df | SS      | MS      | F     | T    | P      | No. permutations |
|----------------------------|----|---------|---------|-------|------|--------|------------------|
| PERMANOVA results (source) |    |         |         |       |      |        |                  |
| Site                       | 1  | 0.13154 | 0.13154 | 0.91  |      | 0.5    | 9,965            |
| pH                         | 2  | 0.7408  | 0.3704  | 2.56  |      | 0.02   | 9,936            |
| Site × pH                  | 2  | 0.50459 | 0.2523  | 1.74  |      | 0.1    | 9,956            |
| Residual                   | 18 | 2.6093  | 0.14496 |       |      |        |                  |
| Total                      | 23 | 3.9863  |         |       |      |        |                  |
| Pairwise comparisons       |    |         |         |       |      |        |                  |
| Ambient × low              |    |         |         |       | 1.06 | 0.4    | 9,950            |
| Low × extreme low          |    |         |         |       | 2.42 | 0.002  | 9,955            |
| Ambient × extreme low      |    |         |         |       | 1.62 | 0.056  | 9,952            |
| PERMDISP (dispersion)      |    |         |         |       |      |        |                  |
| pH                         | 2  |         |         | 14.92 |      | 0.0002 |                  |
| Pairwise comparisons       |    |         |         |       |      |        |                  |
| Ambient × low              |    |         |         |       | 4.52 | 0.003  | 9,999            |
| Low × extreme low          |    |         |         |       | 0.49 | 0.7    | 9,999            |
| Ambient × extreme low      |    |         |         |       | 4.67 | 0.001  | 9,999            |

**Table S4. Statistical tests of differences in amount of community change through time (distance traveled in 2D nMDS space)**

| ANOVA results (source) | df | SS    | MS   | F    | T    | P    | No. permutations |
|------------------------|----|-------|------|------|------|------|------------------|
| Site                   | 1  | 0.32  | 0.32 | 0.23 |      | 0.6  | 9,833            |
| pH                     | 2  | 15.29 | 7.64 | 5.42 |      | 0.01 | 9,938            |
| Site × pH              | 2  | 8.38  | 4.19 | 2.98 |      | 0.07 | 9,952            |
| Residual               | 18 | 25.35 | 1.41 |      |      |      |                  |
| Total                  | 23 | 49.35 |      |      |      |      |                  |
| Pairwise comparisons   |    |       |      |      |      |      |                  |
| Ambient × low          |    |       |      |      | 0.69 | 0.5  | 9,837            |
| Low × extreme low      |    |       |      |      | 2.67 | 0.02 | 9,830            |
| Ambient × extreme low  |    |       |      |      | 2.89 | 0.01 | 9,832            |

**Table S5. RM-ANOVA results for mean abundance and size of urchins**

| Source                                 | df | MS     | F     | P     |
|----------------------------------------|----|--------|-------|-------|
| <i>Arbacia lixula</i> abundance        |    |        |       |       |
| Between subjects                       |    |        |       |       |
| pH                                     | 1  | 333.06 | 4.109 | 0.18  |
| Error                                  | 2  | 81.06  |       |       |
| Within subjects                        |    |        |       |       |
| Date                                   | 3  | 54.06  | 3.88  | 0.03* |
| Date × pH                              | 3  | 48.73  | 12.51 | 0.03* |
| Error                                  | 6  | 3.9    |       |       |
| <i>Paracentrotus lividus</i> abundance |    |        |       |       |
| Between subjects                       |    |        |       |       |
| pH                                     | 1  | 121    | 0.429 | 0.58  |
| Error                                  | 2  | 282.25 |       |       |
| Within subjects                        |    |        |       |       |
| Date                                   | 3  | 193.17 | 2.23  | 0.24* |
| Date × pH                              | 3  | 285.17 | 3.29  | 0.16* |
| Error                                  | 6  | 86.75  |       |       |
| <i>Arbacia lixula</i> size             |    |        |       |       |
| Between subjects                       |    |        |       |       |
| pH                                     | 1  | 4.15   | 0.31  | 0.64  |
| Error                                  | 2  | 13.37  |       |       |
| Within subjects                        |    |        |       |       |
| Date                                   | 3  | 3.23   | 0.21  | 0.76* |
| Date × pH                              | 3  | 3.5    | 0.229 | 0.74* |
| Error                                  | 6  | 15.35  |       |       |
| <i>Paracentrotus lividus</i> size      |    |        |       |       |
| Between subjects                       |    |        |       |       |
| pH                                     | 1  | 6.83   | 0.04  | 0.86  |
| Error                                  | 2  | 170.6  |       |       |
| Within subjects                        |    |        |       |       |
| Date                                   | 2  | 2.63   | 0.565 | 0.53* |
| Date × pH                              | 2  | 1.52   | 0.327 | 0.63* |
| Error                                  | 4  | 4.662  |       |       |

\*GG adjusted P value.

**Table S6. Seawater pH statistics for approximate month-long sensor deployments across years and seasons**

|                  | Ambient | Low  | Extreme low | Control |
|------------------|---------|------|-------------|---------|
| South: 10/7/2009 |         |      |             |         |
| Mean             | 8.00    | 7.83 | —           | —       |
| SD               | 0.07    | 0.31 | —           | —       |
| CV               | 0.01    | 0.04 | —           | —       |
| South: 2/1/2010  |         |      |             |         |
| Mean             | —       | 7.71 | 6.56        | —       |
| SD               | —       | 0.39 | 0.49        | —       |
| CV               | —       | 0.05 | 0.08        | —       |
| South: 5/1/2010  |         |      |             |         |
| Mean             | 8.07    | 7.83 | 6.37        | —       |
| SD               | 0.09    | 0.26 | 0.34        | —       |
| CV               | 0.01    | 0.03 | 0.05        | —       |
| South: 10/1/2010 |         |      |             |         |
| Mean             | 8.04    | 7.84 | 6.78        | 8.04    |
| SD               | 0.09    | 0.24 | 0.67        | 0.02    |
| CV               | 0.01    | 0.03 | 0.10        | 0.002   |
| North: 9/1/2010  |         |      |             |         |
| Mean             | 7.96    | 7.77 | 7.21        | —       |
| SD               | 0.06    | 0.19 | 0.34        | —       |
| CV               | 0.01    | 0.02 | 0.05        | —       |

The control site was taken at over 4 km away from the vent sites in a rocky reef community at 1.5-m depth.
